# Supplementary material for: Synthesis of efficient submicron γ-AlON Mn2+, Mg2+ phosphors for mini-LEDs by a coprecipitation precursor method
Source: Royal Society of Chemistry journal article supplement (doi:10.1039/d4tc00382a), 2024-01-01
Supplement: d4tc00382a1.pdf [file d4tc00382a1.pdf]

## Supporting Information

### Synthesis of Efficient Submicron $\gamma$ - AlON Mn<sup>2+</sup>, Mg<sup>2+</sup>

### Phosphors for Mini-LED by Coprecipitation Precursor

### Method

Zhezhe Su, Yuhua Wang\* and Takatoshi Seto\*

National & local Joint Engineering Laboratory for Optical Conversion Materials and Technology,

School of School of Materials and Energy, Lanzhou University, Lanzhou, 730000, China.

E-mail: [wyh@lzu.edu.cn](mailto:wyh@lzu.edu.cn); [seto@lzu.edu.cn](mailto:seto@lzu.edu.cn)

ID: 0000-0001-7047-4760 (Y. Wang) , 0000-0002-3928-2557 (T. Seto)

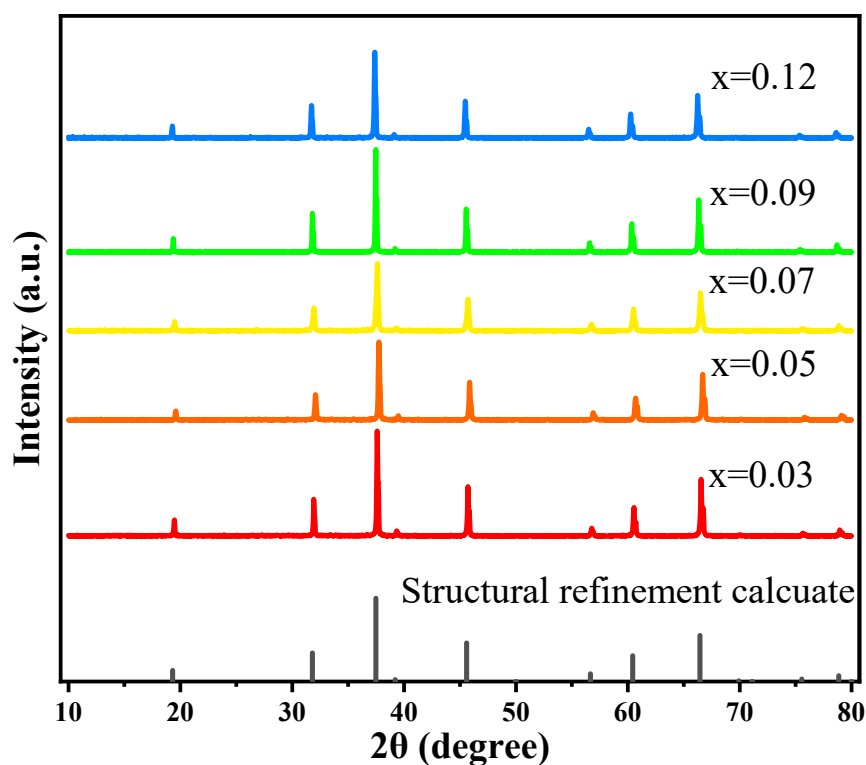

Fig S1. X-ray powder diffraction patterns of  $\gamma$ -AlON: $x$ Mn<sup>2+</sup>

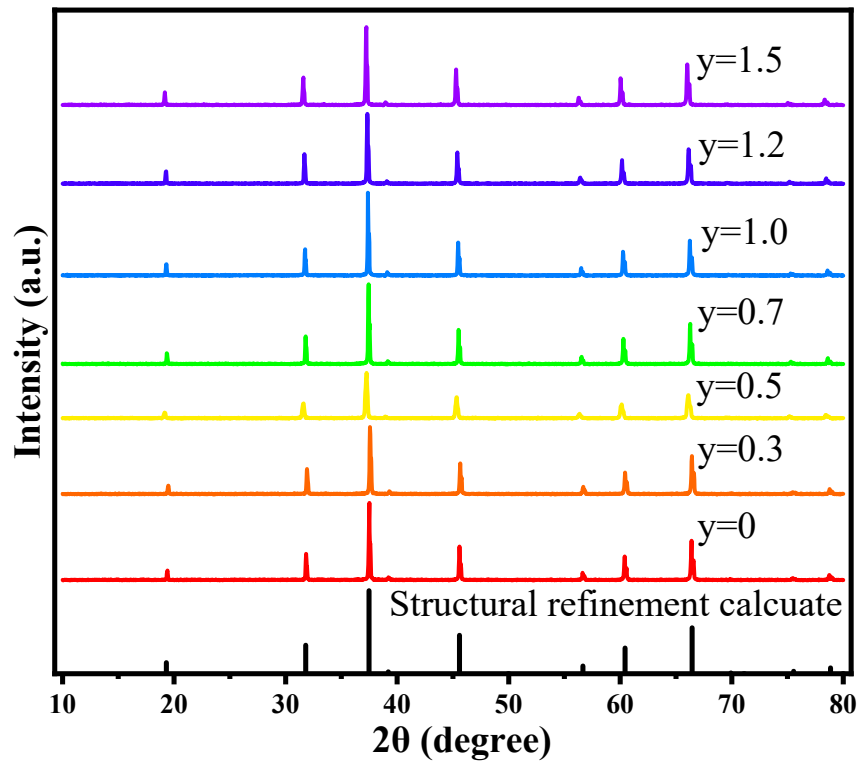

Fig S2. X-ray powder diffraction patterns of  $\gamma$ -AlON:0.07Mn<sup>2+</sup>, $y$ Mg<sup>2+</sup>

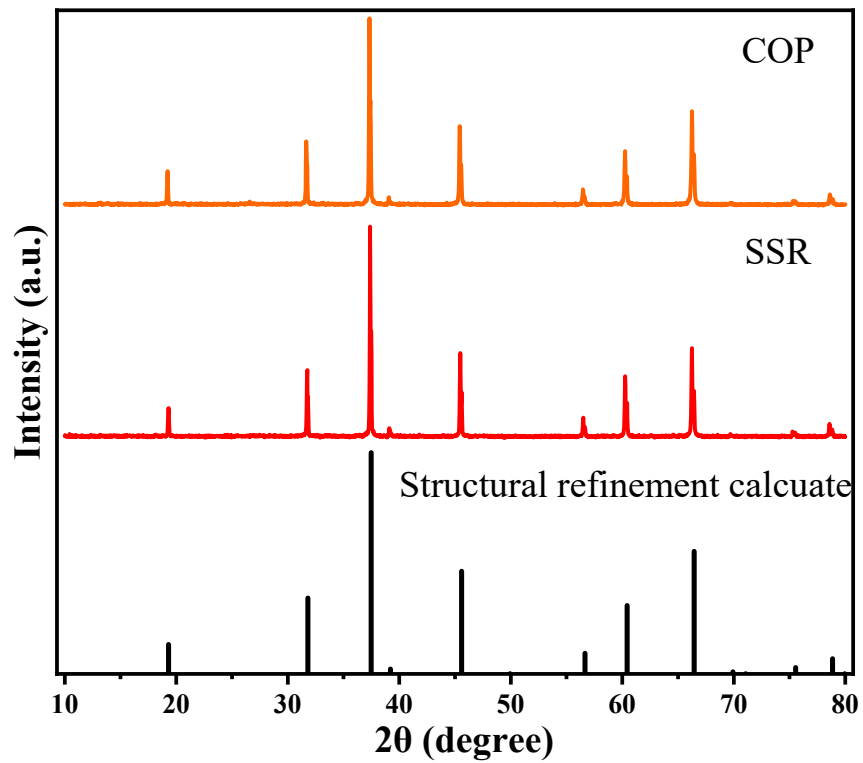

Fig S3. X-ray powder diffraction patterns of SSR and COP

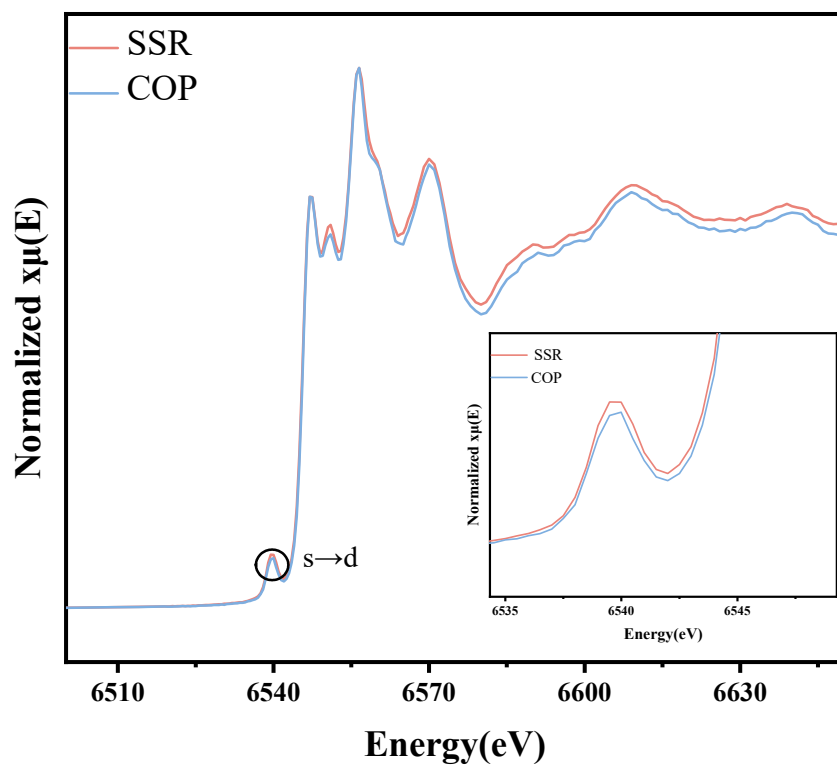

Fig S4. The XANES data of SSR and COP samples
